# Supplementary figures and images for: SFRP4 Reduces Atherosclerosis Plaque Formation in ApoE Deficient Mice
Source: Hindawi journal article supplement (doi:10.1155/2023/8302289), 2023-04-25

Supplementary Figure 1

A

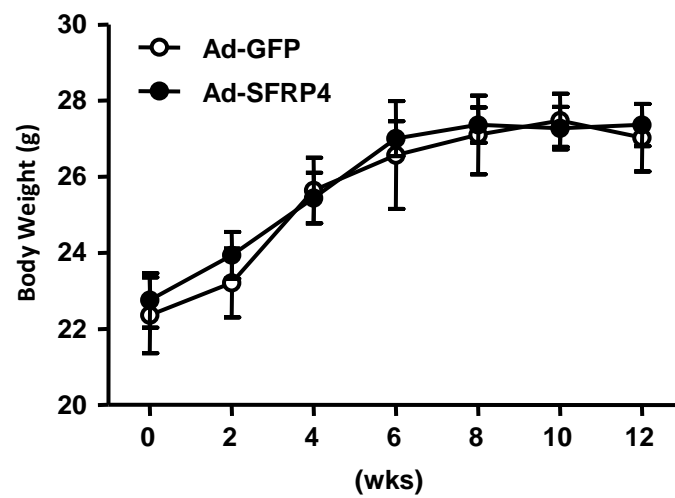

B

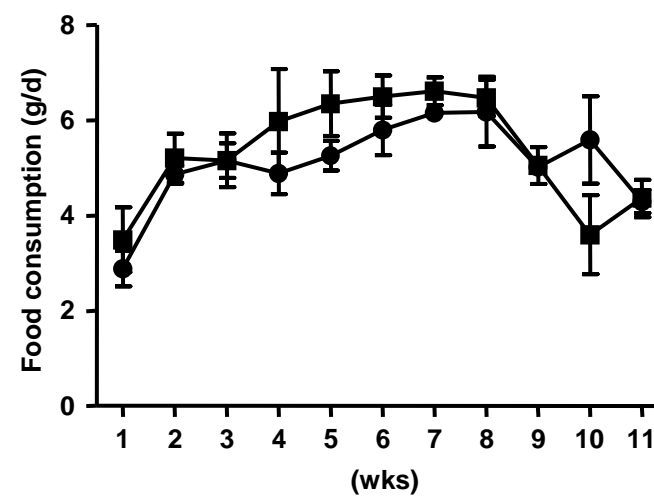

Supplementary Figure 2

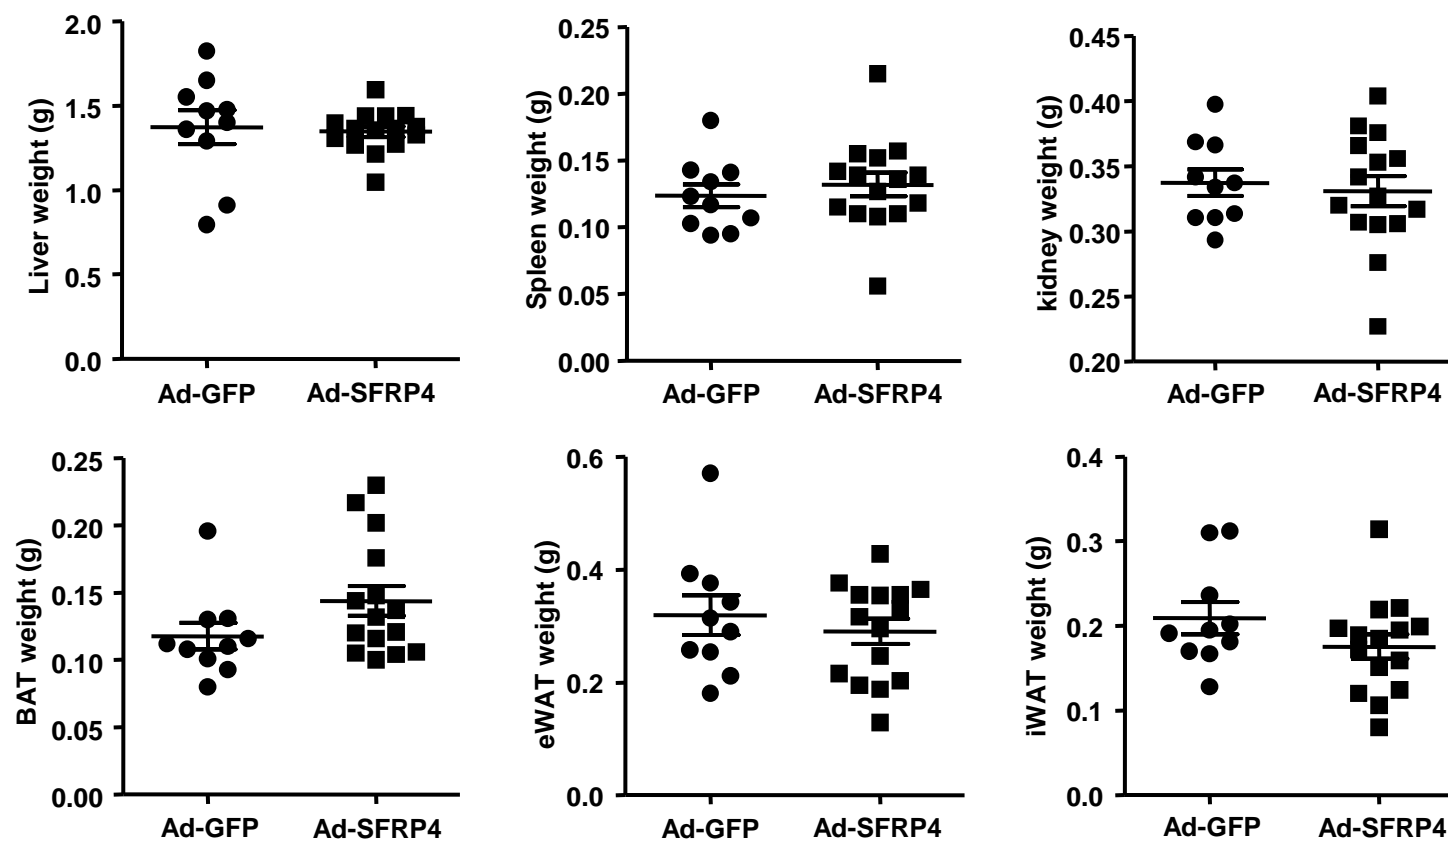

Supplement: f1 [file 8302289.f1.zip]
